# Supplementary material for: Evidence of extensive reef development and high coral cover in nearshore environments: implications for understanding coral adaptation in turbid settings
Source: PubMed Central journal article supplement (PMC4949480; doi:10.1038/srep29616), 2016-07-19
Supplement: srep29616-s3.pdf [file srep29616-s3.pdf]

# Evidence of extensive reef development and high coral cover in nearshore environments: implications for understanding coral adaptation in turbid settings

K. M. Morgan, C.T. Perry, S.G. Smithers, J. A. Johnson and J. J. Daniell

## Supplementary Information

**Supplementary Table S1.** Reef rugosity classification scheme (1-5), modified from Polunin and Roberts (1993), used to categorise the three-dimensionality of reef benthic communities and substrata within Paluma Shoals Reef Complex (PSRC).

**Supplementary Table S2.** Inventory of coral genera recorded within Paluma Shoals Reef Complex (PSRC).

**Supplementary Table S3.** Mean (s.d.) relative abundance (%) of hard coral assemblages between reef sites surveyed within Paluma Shoals Reef Complex (PSRC).

**Supplementary Table S4.** SIMPER analysis of pooled habitat groups showing discriminating substrata or coral genera driving average dissimilarity between habitat classifications at Paluma Shoals Reef Complex (PSRC). Mean relative abundance (%) of benthic cover for each of the six habitat classifications is presented.

**Supplementary Table S5.** Cross-shelf hard coral cover (%), distance from the coast and reef morphology for reef sites within the central Great Barrier Reef (sector-Townsville) reported by Australian Institute of Marine Science (AIMS) long-term reef monitoring programme (<http://data.aims.gov.au/monmap3/cruisereport.jsp?cruise=all>). Values from the present study at Paluma Shoals Reef Complex (PSRC) are included.

**Supplementary Figure S1.** Dendrogram of 442 sites within Paluma Shoals Reef Complex (PSRC) using group average clustering from Bray-Curtis similarities. Six habitat cluster groups which are <70% similar were classified from benthic cover (%) data of substrata type and coral genera.

**Supplementary Figure S2.** Seafloor mapping of Paluma Shoals Reef Complex (PSRC) showing the position of single-beam survey lines used for the construction of the bathymetric model (black lines) and location of still frame sites (10-frame running average) for the analysis of benthic cover (yellow circles). Map was generated in ArcMap 10.2.2 (<http://www.esri.com/>) using WorldView-2 satellite imagery courtesy of the DigitalGlobe Foundation (<http://www.digitalglobe.com/>) as a basemap.

**Supplementary Video S1.** High coral cover and reef rugosity within nearshore coral communities of Halifax Bay, central Great Barrier Reef, Australia. Reef communities are typically dominated by *Montipora* spp. and *Acropora* spp. corals.

**Supplementary Video S2.** Extensive stands of foliose coral framework (mostly *Turbinaria* spp.) within nearshore Halifax Bay.

**Supplementary Table S1.** Reef rugosity classification scheme (1-5), modified from Polunin and Roberts (1993), used to categorise the three-dimensionality of reef benthic communities and substrata within Paluma Shoals Reef Complex (PSRC).

| Scale (1-5) | Description                                                                                                        | Representative images |
|-------------|--------------------------------------------------------------------------------------------------------------------|-----------------------|
| 1           | Flat and featureless, typically soft-sediment sand/muds. No three-dimensionality.                                  |                       |
| 2           | Low rugosity coarse gravel/rubble with isolated dead or live coral framework                                       |                       |
| 3           | Moderate rugosity, high coral cover comprising typically low-profile colonies (e.g encrusting or tabular).         |                       |
| 4           | High rugosity, mixed structurally-complex coral framework (branching, tabular and foliose).                        |                       |
| 5           | Very high rugosity (associated with high coral cover), high three-dimensionality with many crevices and overhangs. |                       |

**Supplementary Table S2.** Inventory of coral genera recorded within Paluma Shoals Reef Complex (PSRC).

| Coral genera       |                    |
|--------------------|--------------------|
| <i>Acropora</i>    | <i>Hydnophora</i>  |
| <i>Turbinaria</i>  | <i>Platygyra</i>   |
| <i>Montipora</i>   | <i>Favities</i>    |
| <i>Porites</i>     | <i>Favia</i>       |
| <i>Goniastrea</i>  | <i>Pocillopora</i> |
| <i>Fungia</i>      | <i>Galaxea</i>     |
| <i>Stylophora</i>  | <i>Symphyllia</i>  |
| <i>Cyphastrea</i>  | <i>Euphyllia</i>   |
| <i>Pectinia</i>    | <i>Pavona</i>      |
| <i>Lobophyllia</i> | <i>Caulastrea</i>  |
| <i>Goniopora</i>   |                    |

**Supplementary Table S3.** Mean (s.d.) relative abundance (%) of hard coral assemblages between reef sites surveyed within Paluma Shoals Reef Complex (PSRC).

|                                | OPS       | OPSA      | OPSB      | OPSC    | OPSD      | CC      |
|--------------------------------|-----------|-----------|-----------|---------|-----------|---------|
| Depth at highest point (m LAT) | 0         | -0.4      | -0.4      | -0.6    | -0.6      | -0.4    |
| Hard coral (%)                 | 18 (26)   | 23 (31)   | 44 (37)   | 64 (30) | 54 (36)   | 72 (20) |
| <i>Acropora</i> spp. (%)       | 10 (28)   | 30 (41)   | 32 (38)   | 10 (21) | 26 (33)   | 3 (3)   |
| <i>Montipora</i> spp. (%)      | 4 (18)    | 8 (23)    | 1 (10)    | 6 (18)  | 21 (30)   | 80 (15) |
| <i>Turbinaria</i> spp. (%)     | 71 (42)   | 38 (43)   | 63 (40)   | 81 (28) | 31 (31)   | 5 (6)   |
| <i>Porites</i> spp. (%)        | 3 (15)    | 17 (36)   | 3 (14)    | 1 (6)   | 16 (36)   | 1 (3)   |
| Other coral (%)                | 11 (28)   | 6 (22)    | 1 (7)     | 1 (8)   | 6 (20)    | 1 (3)   |
| Reef rugosity (R)              | 1.2 (0.6) | 2.8 (0.8) | 3.1 (0.7) | 3.8 (1) | 4.2 (0.9) | 5 (0.5) |

**Supplementary Table S4.** SIMPER analysis of pooled habitat groups showing discriminating substrata or coral genera driving average dissimilarity between habitat classifications at Paluma Shoals Reef Complex (PSRC). Mean relative abundance (%) of benthic cover for each of the six habitat classifications is presented.

|                                          | Average<br>dissimilarity | Contribution<br>(%) | Cumulative<br>(%) | Mean relative abundance (%) |           |           |           |           |           |
|------------------------------------------|--------------------------|---------------------|-------------------|-----------------------------|-----------|-----------|-----------|-----------|-----------|
|                                          |                          |                     |                   | Habitat 1                   | Habitat 2 | Habitat 3 | Habitat 4 | Habitat 5 | Habitat 6 |
| Sand                                     | 25.5                     | 31.6                | 31.6              | 46.8                        | 91.2      | 18.3      | 3.0       | 3.3       | 28.7      |
| Rubble                                   | 14.0                     | 17.4                | 49.0              | 17.6                        | 4.4       | 5.6       | 32.5      | 74.0      | 54.6      |
| <i>Montipora</i>                         | 12.5                     | 15.5                | 64.5              | 13.5                        | 1.6       | 5.1       | 54.9      | 13.0      | 8.4       |
| Live coral                               | 11.7                     | 14.5                | 79.0              | 21.4                        | 1.9       | 72.1      | 46.8      | 13.1      | 11.0      |
| <i>Acropora</i>                          | 5.1                      | 6.3                 | 85.3              | 2.3                         | 0.2       | 3.2       | 15.7      | 19.3      | 6.5       |
| <i>Turbinaria</i>                        | 3.9                      | 4.8                 | 90.1              | 2.1                         | 1.3       | 79.5      | 7.2       | 2.7       | 3.0       |
| Dead coral                               | 3.1                      | 3.9                 | 94.0              | 8.5                         | 1.0       | 4.2       | 11.5      | 5.9       | 3.5       |
| <i>Porites</i>                           | 2.0                      | 2.4                 | 96.4              | 25.5                        | 1.7       | 1.1       | 1.8       | 2.3       | 7.5       |
| Other coral                              | 1.7                      | 2.1                 | 98.5              | 3.1                         | 1.6       | 1.2       | 3.4       | 3.1       | 7.5       |
| Macroalgae                               | 1.2                      | 1.5                 | 100.0             | 0.0                         | 0.2       | 0.0       | 4.1       | 2.5       | 0.4       |
| Mean average dissimilarity: <b>80.62</b> |                          |                     |                   |                             |           |           |           |           |           |

**Supplementary Table S5.** Cross-shelf hard coral cover (%), distance from the coast and reef morphology for reef sites within the central Great Barrier Reef (sector-Townsville) reported by Australian Institute of Marine Science (AIMS) long-term reef monitoring programme (<http://data.aims.gov.au/monmap3/cruisereport.jsp?cruise=all>). Values from the present study at Paluma Shoals Reef Complex (PSRC) are included.

| Reef                | Shelf location | Mean hard coral (%) | Distance from coast (km) | Year | AIMS site number   | Reef type       |
|---------------------|----------------|---------------------|--------------------------|------|--------------------|-----------------|
| Paluma Shoals       | Nearshore      | 55                  | 1.1                      | 2010 | Palmer et al. 2010 | Marginal        |
| OPS                 | Nearshore      | 18                  | 2.5                      | 2013 | This study         | Marginal        |
| OPSD                | Nearshore      | 53                  | 2.7                      | 2014 | This study         | Marginal        |
| OPSC                | Nearshore      | 64                  | 2.7                      | 2014 | This study         | Marginal        |
| OPSA                | Nearshore      | 22                  | 2.7                      | 2013 | This study         | Marginal        |
| OPSB                | Nearshore      | 43                  | 2.8                      | 2013 | This study         | Marginal        |
| Middle Reef         | Nearshore      | 33                  | 4.2                      | 2013 | (No. 19-011)       | Planar reef     |
| Geoffery Bay        | Inner          | 25                  | 11                       | 2011 | No description     | Fringing reef   |
| Pelorus             | Inner          | 9                   | 14                       | 2011 | No description     | Fringing reef   |
| Orpheus Island East | Inner          | 10                  | 17                       | 2010 | No description     | Fringing reef   |
| Pandora Reef        | Inner          | 38                  | 17                       | 2013 | (No. 18-065)       | Fringing reef   |
| Havannah Island     | Inner          | 1                   | 24                       | 2013 | (No. 18-051)       | Planar reef     |
| Grub Reef           | Middle         | 6                   | 74                       | 2012 | (No. 18-077)       | Lagoonal reef   |
| John Brewer Reef    | Middle         | 10                  | 75                       | 2013 | (No. 18-075)       | Lagoonal reef   |
| Centipede Reef      | Middle         | 9                   | 76                       | 2012 | (No. 18-088)       | Crescentic reef |
| Rib Reef            | Middle         | 16                  | 76                       | 2013 | (No. 18-032)       | Crescentic reef |
| Davies Reef         | Middle         | 27                  | 82                       | 2013 | (No. 18-096)       | Lagoonal reef   |
| Lynch's Reef        | Middle         | 3                   | 82                       | 2012 | (No. 18-091)       | Patch reef      |
| Fork Reef           | Outer          | 6                   | 86                       | 2012 | (No. 18-083)       | Crescentic reef |
| Fore and Aft Reef   | Middle         | 3                   | 86                       | 2012 | (No. 18-043)       | Patch reef      |
| Little Kelso Reef   | Middle         | 12                  | 87                       | 2012 | (No. 18-031)       | Planar reef     |
| Kelso Reef          | Middle         | 7                   | 90                       | 2012 | (No. 18-030)       | Crescentic reef |
| Roxburgh Reef       | Middle         | 6                   | 93                       | 2012 | No description     | Planar reef     |
| Chicken Reef        | Outer          | 11                  | 94                       | 2013 | (No. 18-086)       | Crescentic reef |
| Helix Reef          | Middle         | 8                   | 100                      | 2012 | (No. 18-076)       | Patch reef      |
| Knife Reef          | Outer          | 9                   | 108                      | 2012 | (No. 18-081)       | Crescentic reef |
| Dip Reef            | Outer          | 10                  | 117                      | 2013 | (No. 18-039)       | Crescentic reef |
| Myrmidon Reef       | Outer          | 23                  | 128                      | 2013 | (No. 18-034)       | Planar reef     |

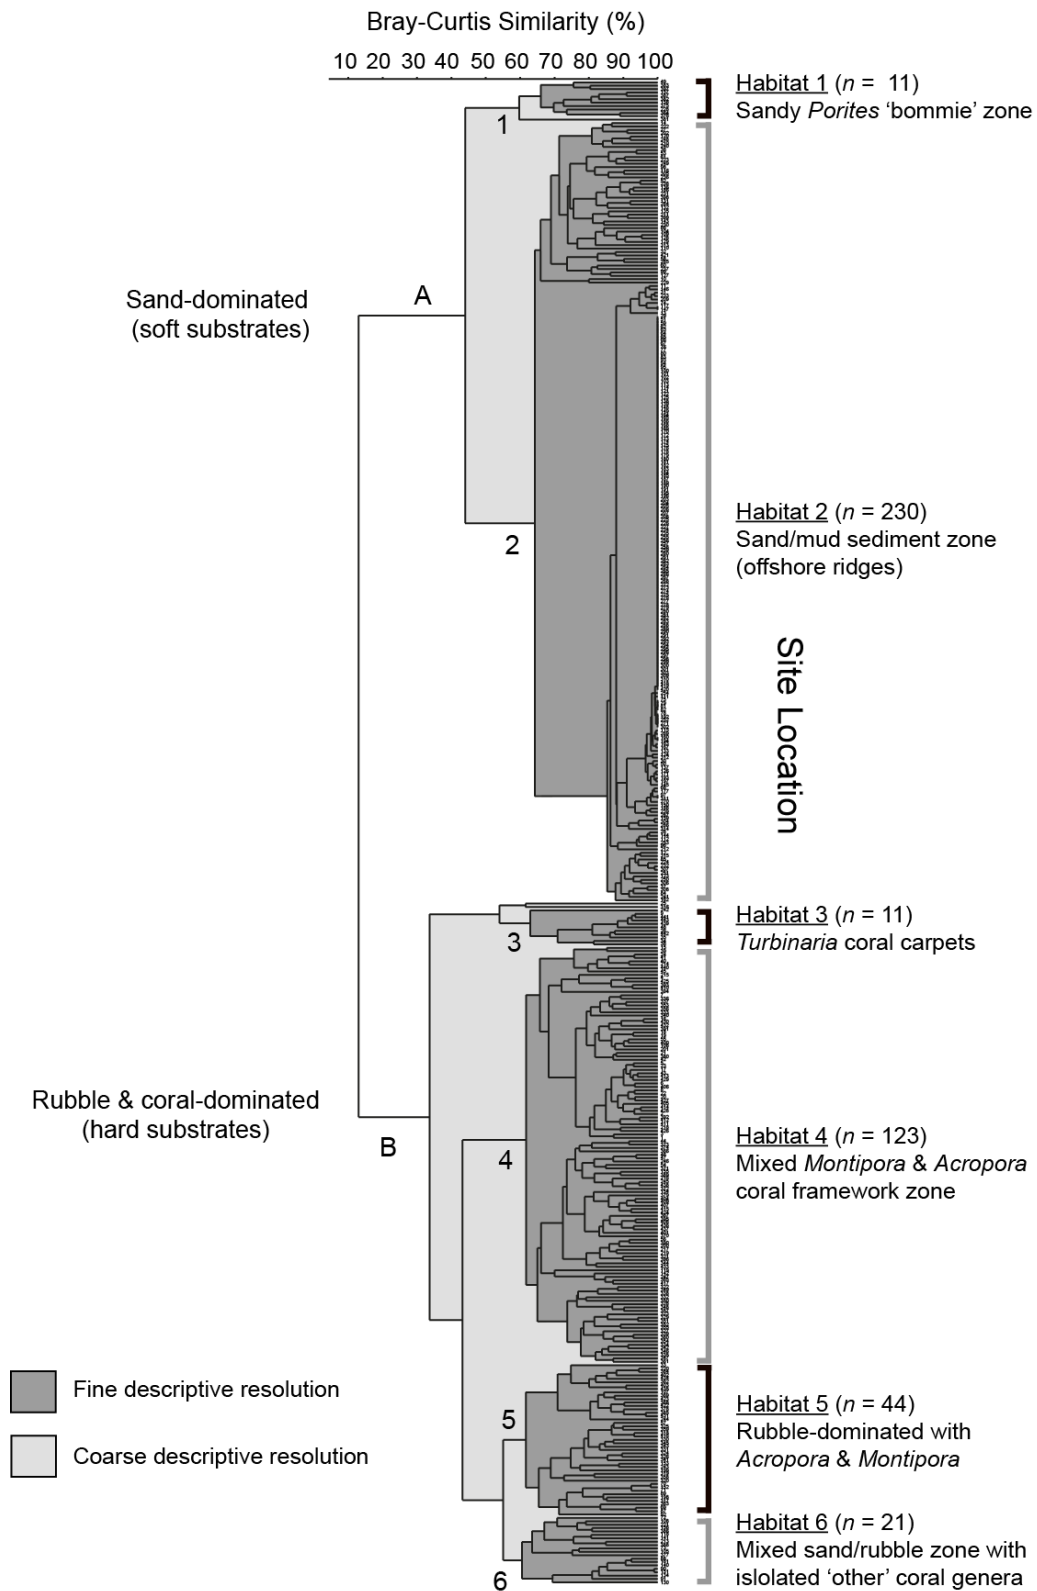

**Supplementary Figure S1.** Dendrogram of 442 sites within Paluma Shoals Reef Complex (PSRC) using group average clustering from Bray-Curtis similarities. Six habitat cluster groups which are <70% similar were classified from benthic cover (%) data of substrata type and coral genera.

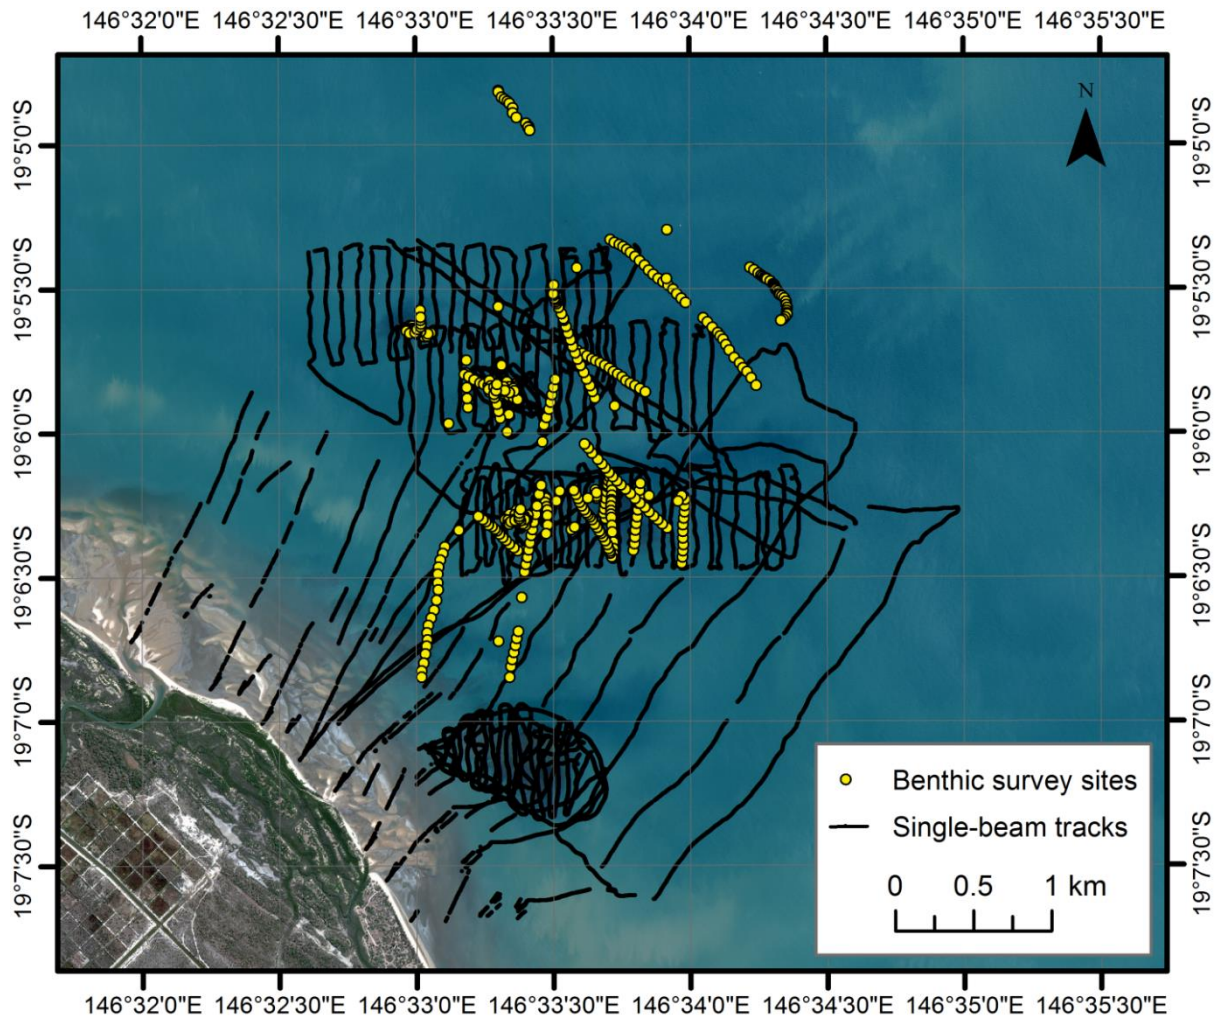

**Supplementary Figure S2.** Seafloor mapping of Paluma Shoals Reef Complex (PSRC) showing the position of single-beam survey lines used for the construction of the bathymetric model (black lines) and location of still frame sites (10-frame running average) for the analysis of benthic cover (yellow circles). Map was generated in ArcMap 10.2.2 (<http://www.esri.com/>) using WorldView-2 satellite imagery courtesy of the DigitalGlobe Foundation (<http://www.digitalglobe.com/>) as a basemap.
